# Supplementary material
Source: PubMed Central journal article supplement (PMC4662083)
Supplement: NIHMS727408-supplement-Figure_2.pdf [file NIHMS727408-supplement-Figure_2.pdf]

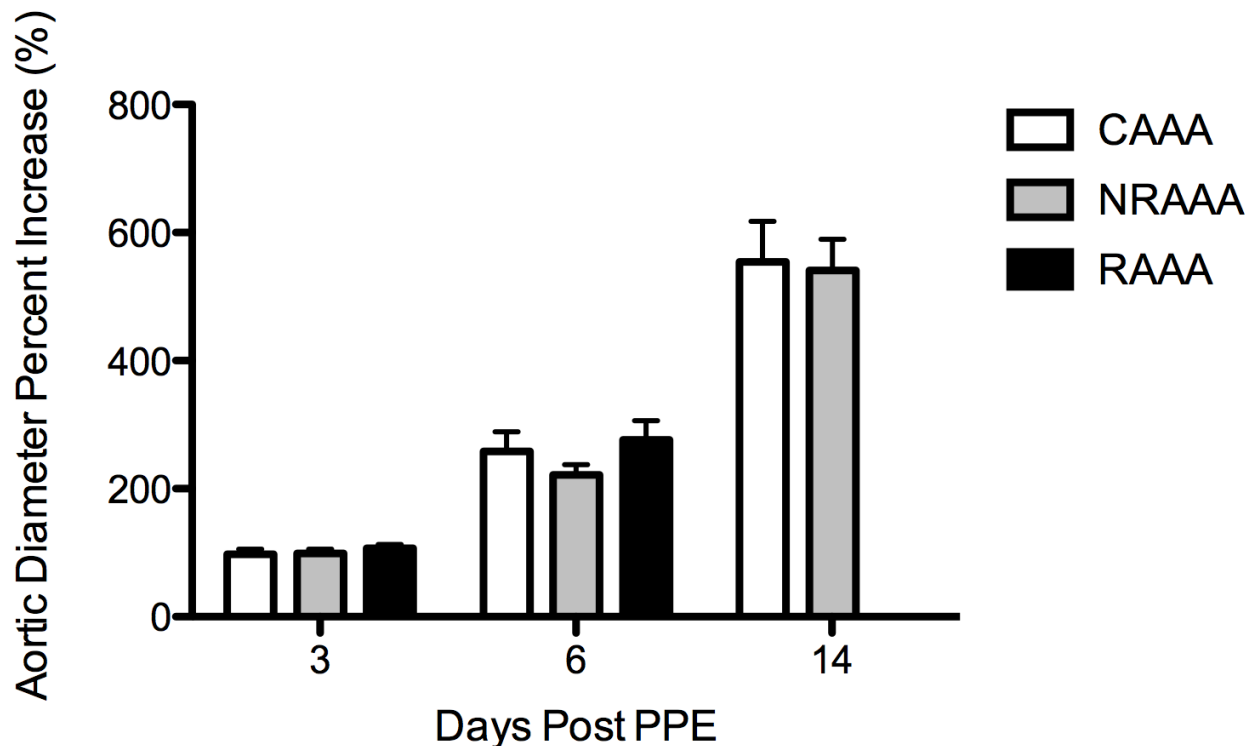

**Supplemental Figure 2. Abdominal aortic aneurysm (AAA) diameter percent increases remained comparable for negative (CAAA) and positive control (NRAAA) as well as AAAs exposed to  $\beta$ -aminopropionitrile (BAPN) that ultimately ruptured (RAAA).** No significant differences in AAA diameter percent increases were noted between the three groups at 3 or 6 days post porcine pancreatic elastase (PPE) exposure, as well as between the negative and positive controls at 14 days. Statistically significant increases were noted at each successive time point after PPE exposure compared to previous day of harvest.
