# Supplementary material
Source: PubMed Central journal article supplement (PMC4662083)
Supplement: NIHMS727408-supplement-Figure_3.pdf [file NIHMS727408-supplement-Figure_3.pdf]

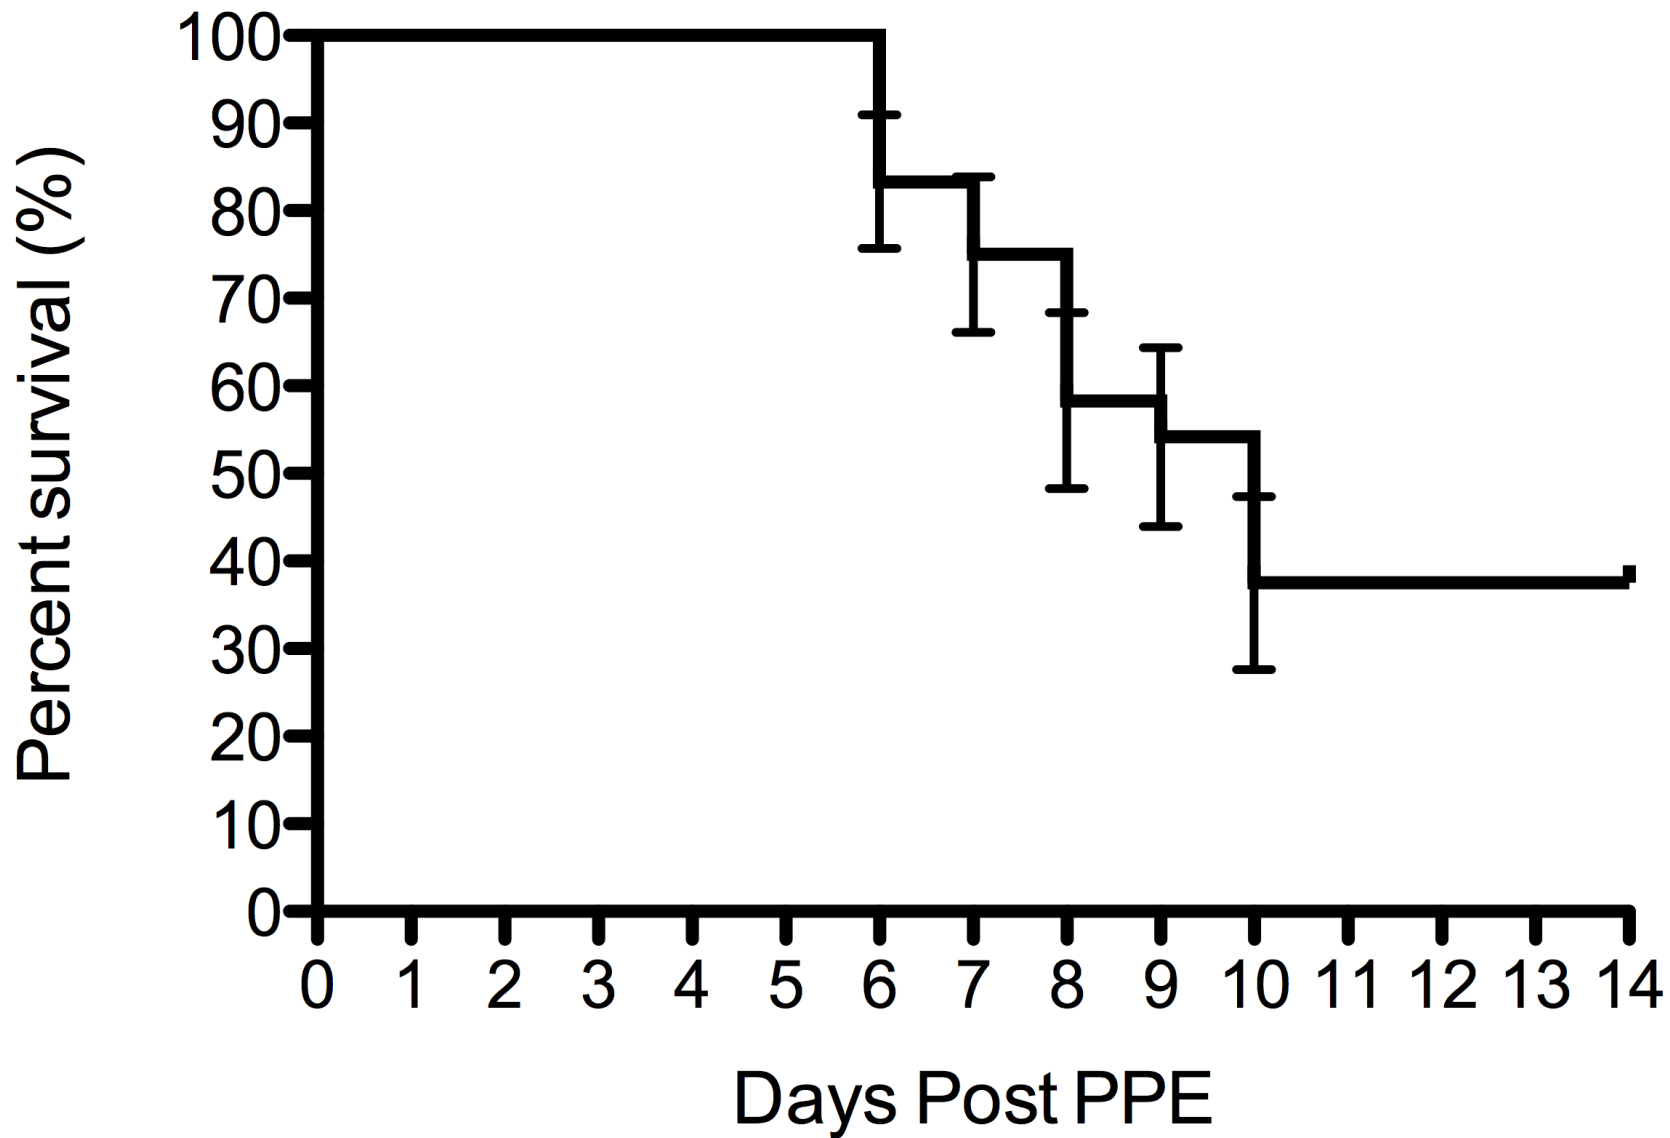

**+BAPN % 100**  
**N 24**

**83 75 58 54 38**  
**20 18 14 13 9**

**Supplemental Figure 3. Kaplan-Meier curve demonstrating survival associated with  $\beta$ -aminopronitrile (BAPN) administration to porcine pancreatic elastase (PPE) exposed rats. Those animals that ruptured did so 6-10 days post PPE exposure, while receiving daily BAPN. A 63% rupture rate was observed for the 24 animals exposed to BAPN.**
