# Supplementary material
Source: PubMed Central journal article supplement (PMC4662083)
Supplement: NIHMS727408-supplement-Figure_4.pdf [file NIHMS727408-supplement-Figure_4.pdf]

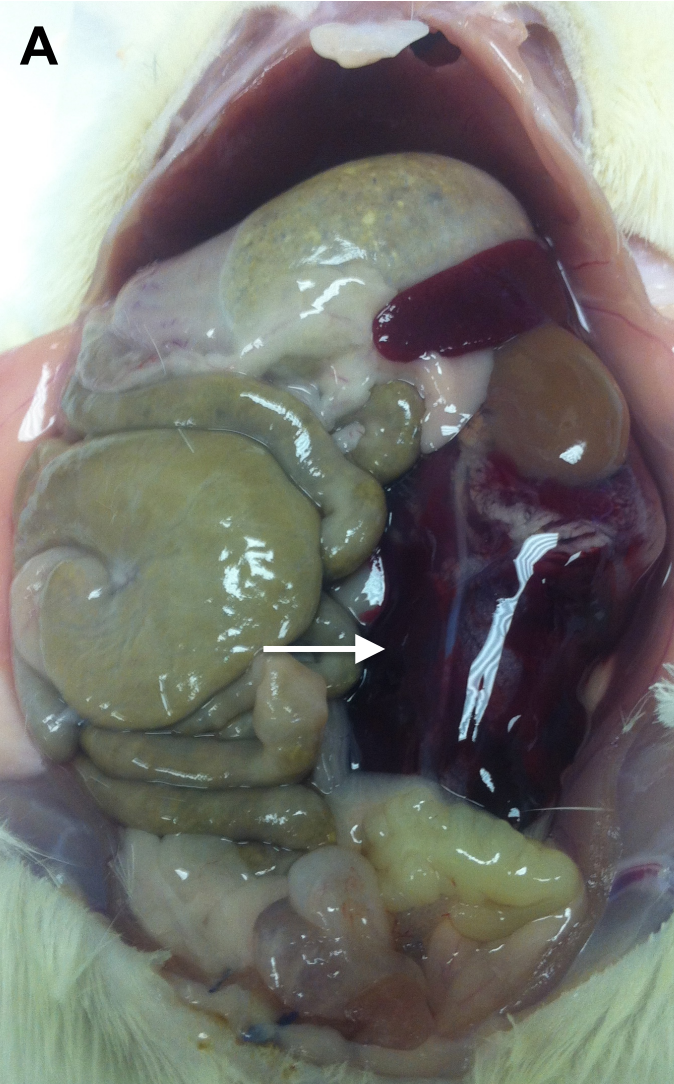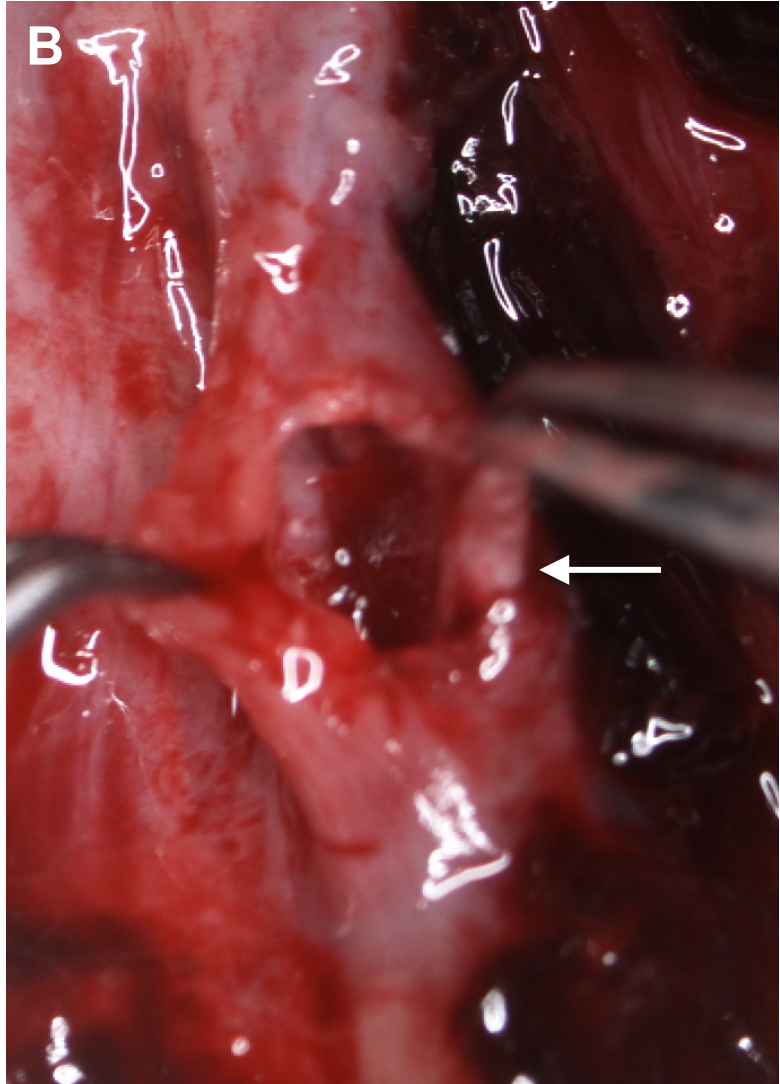

**Supplemental Figure 4. Harvest photos of a ruptured abdominal aortic aneurysm (AAA).** (A) Representative photo of a AAA rupture into the left retroperitoneum and the associated hemorrhage (arrow). (B) Representative photo of a AAA rupture site (arrow).
