# Supplementary material
Source: PubMed Central journal article supplement (PMC4662083)
Supplement: NIHMS727408-supplement-Figure_5.pdf [file NIHMS727408-supplement-Figure_5.pdf]

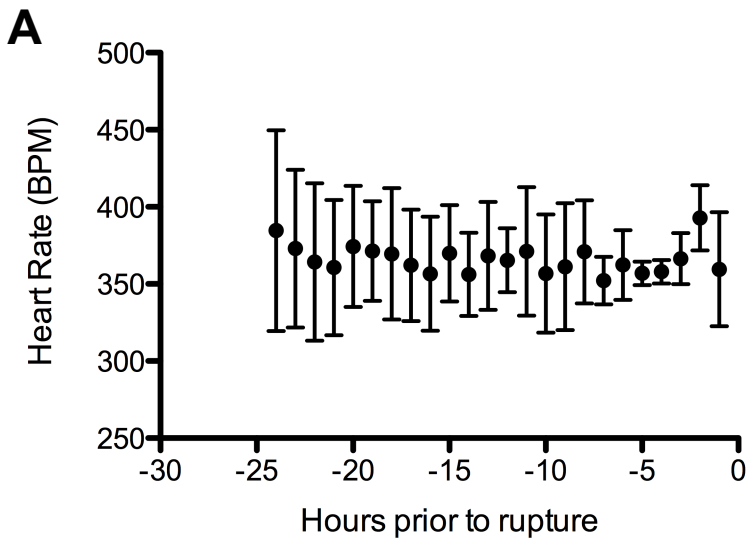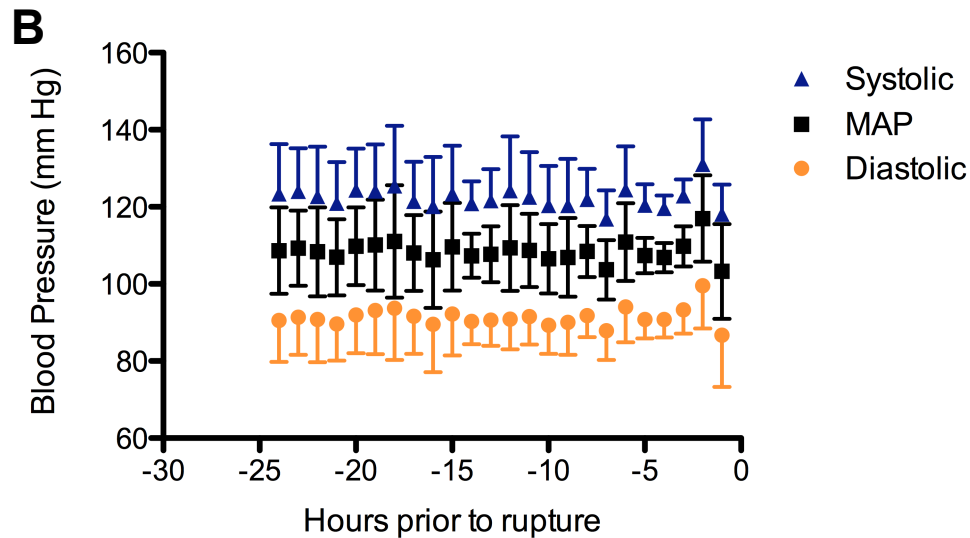

**Supplemental Figure 5. Physiologic responses of BAPN exposed rats 24 hours prior to abdominal aortic aneurysm (AAA) rupture.** (A) Mean heart rate ( $\pm$ SD) and (B) blood pressure ( $\pm$ SD) data over 24-hours prior to AAA rupture, for  $\beta$ -aminopropionitrile exposed (BAPN) rats (N=5). No significant changes in heart rate or blood pressure were noted over the 24 hour period prior to rupture. Mean arterial pressure (MAP).
