# Supplementary material
Source: PubMed Central journal article supplement (PMC4662083)
Supplement: NIHMS727408-supplement-Figure_6.pdf [file NIHMS727408-supplement-Figure_6.pdf]

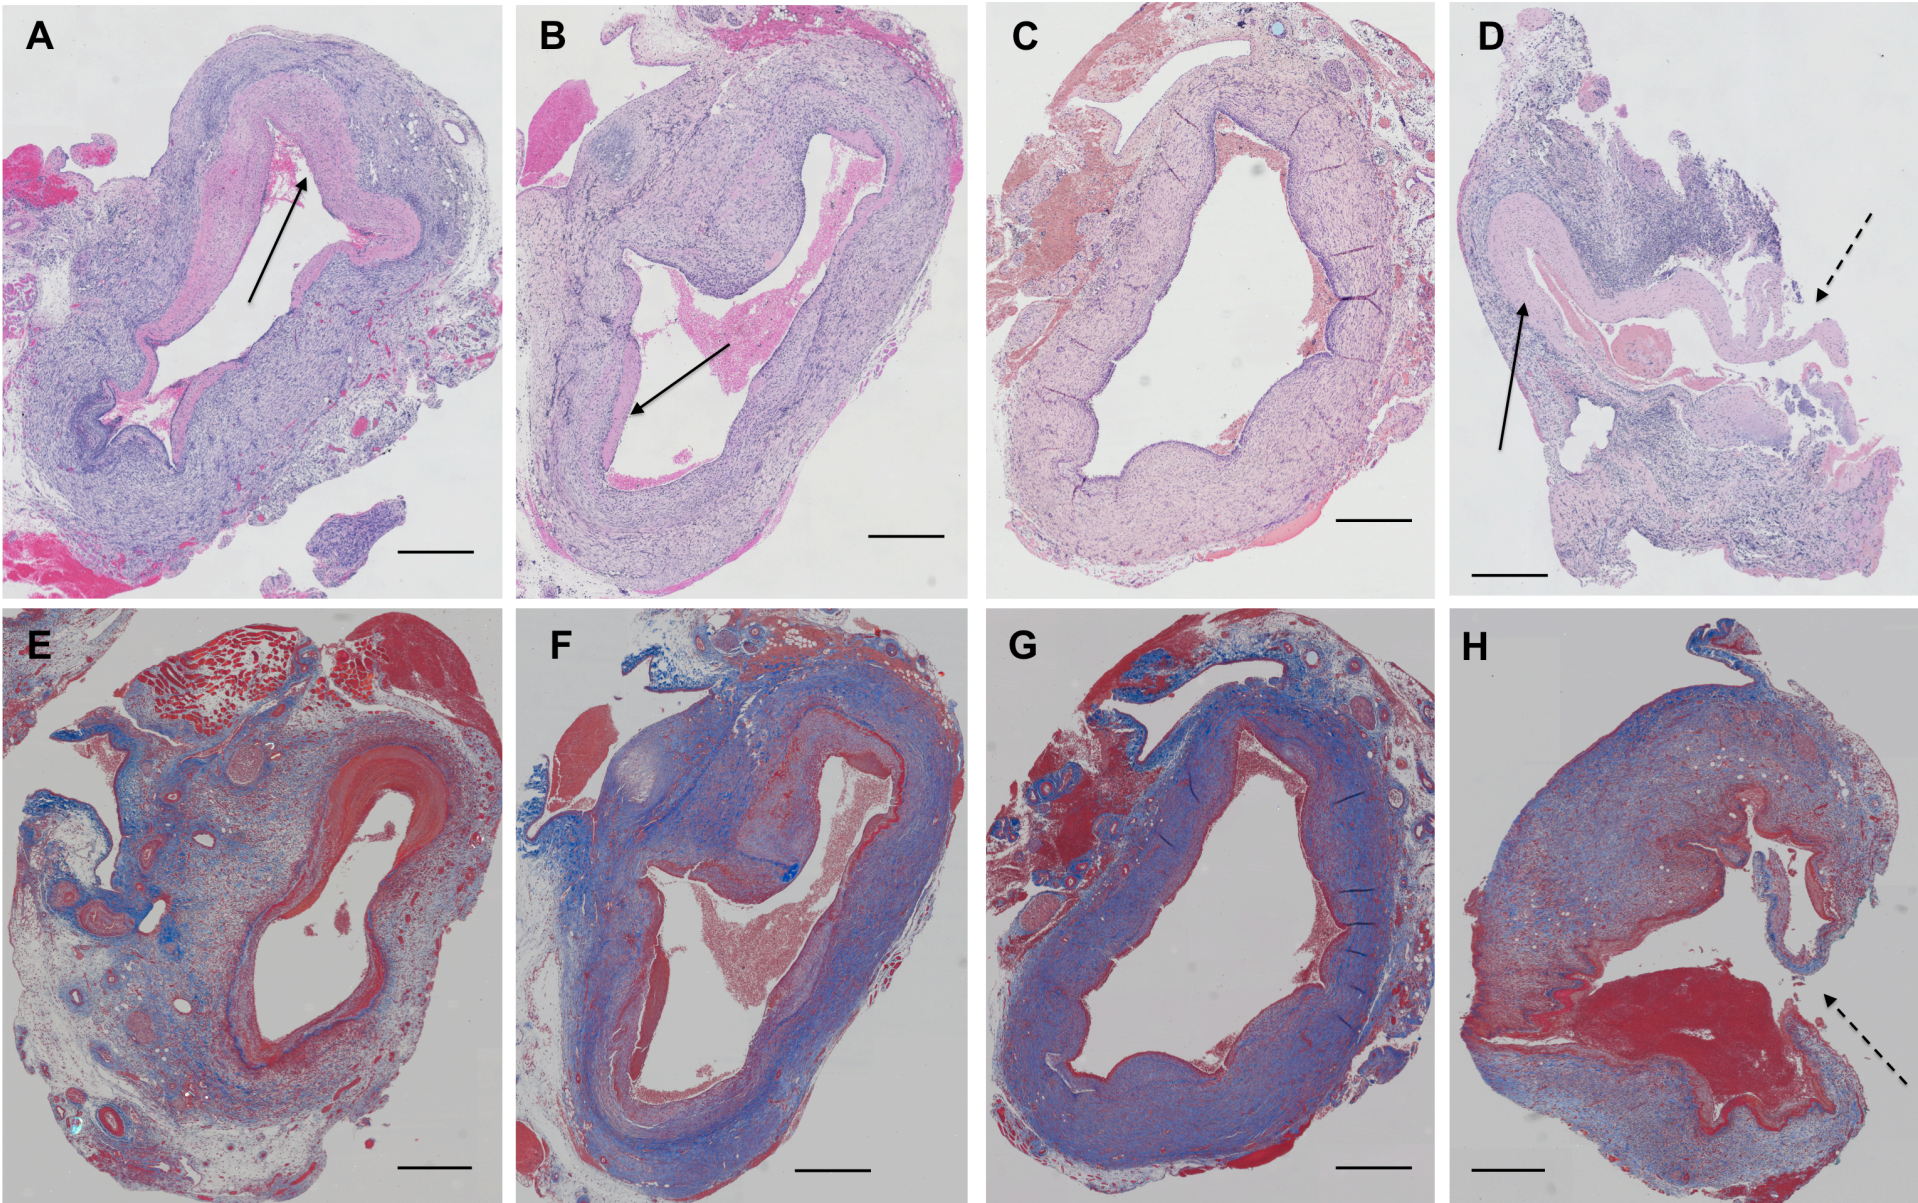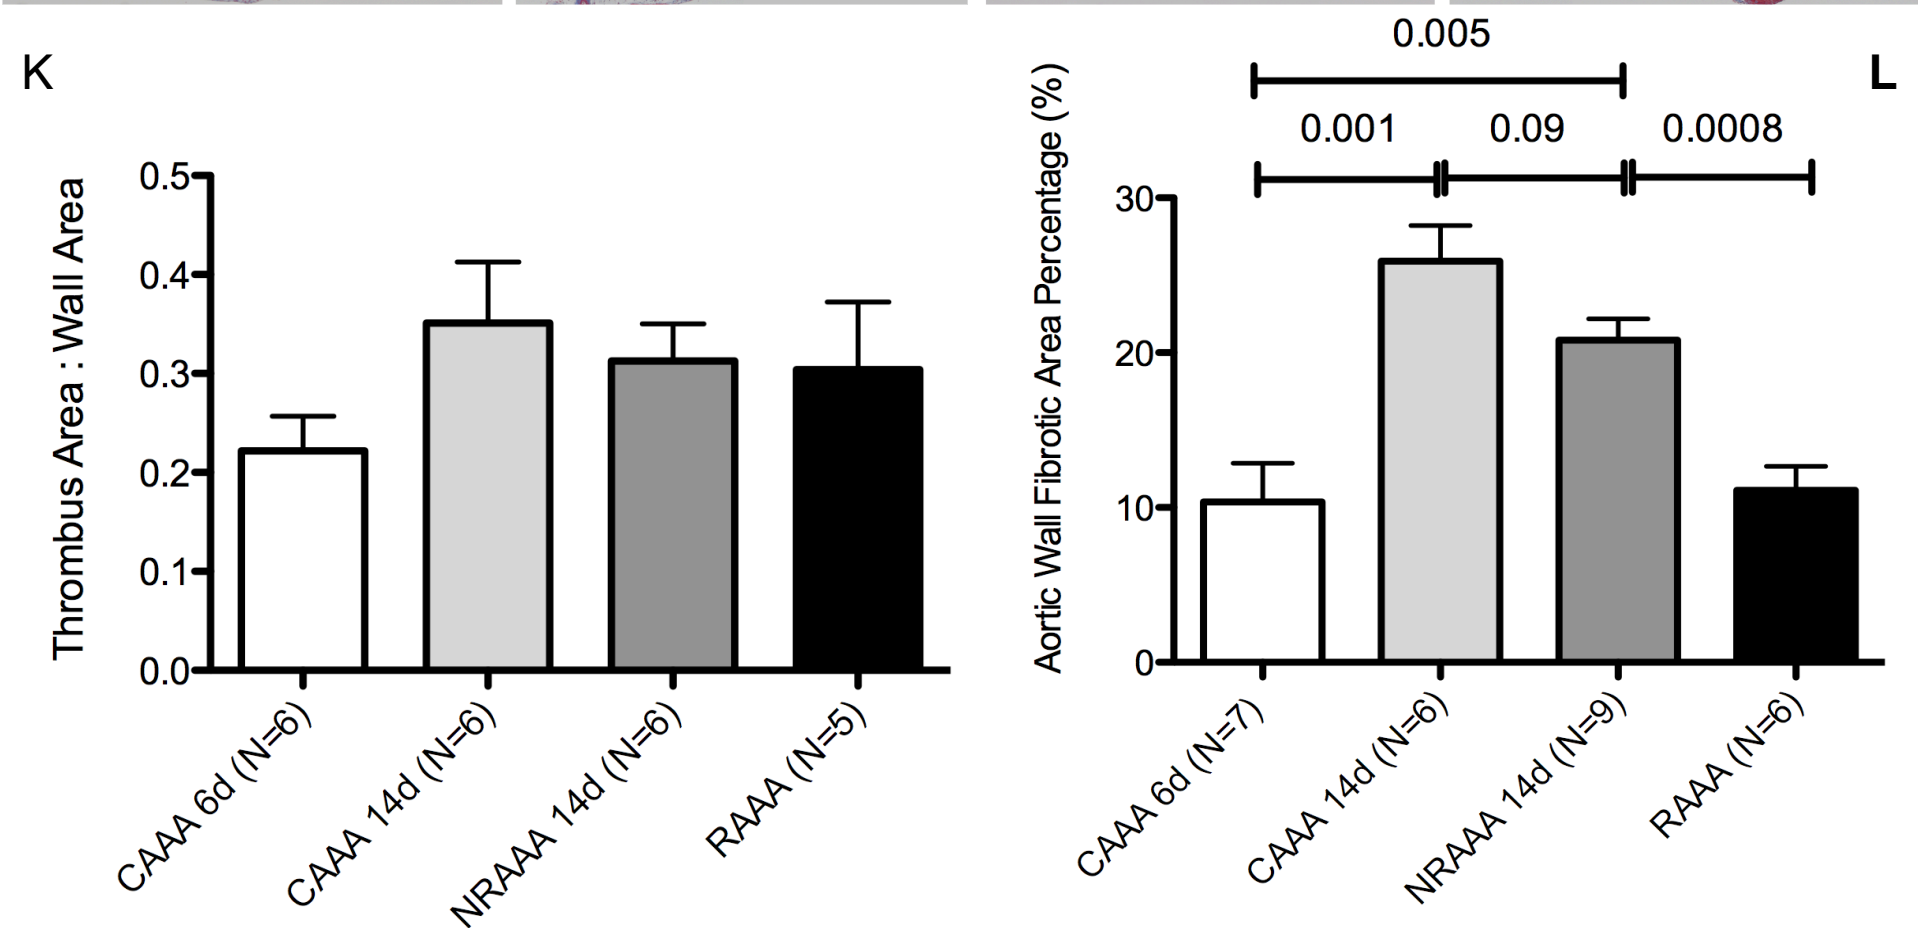

**Supplemental Figure 6. Mural thrombus associated with the porcine pancreatic elastase (PPE) abdominal aortic aneurysm (AAA) model, and decreased aortic wall collagen in ruptured AAA (RAAA) tissue compared to negative control (CAAA 14d) and positive control (NRAAA 14d) tissue.** H&E stained sections at 10x magnification for (A) CAAA 6d, (B) CAAA 14d, (C) NRAAA 14d, and (D) RAAA sections, with arrows identifying mural thrombus. Dashed-arrow identifies rupture site. Trichrome stained sections at 10x magnification for (E) CAAA 6d, (F) CAAA 14d, (G) NRAAA 14d, and (H) RAAA sections, with collagen stained blue. (A-H) Scale bar 500µm. (K) Mean thrombus area (µm<sup>2</sup>) to total AAA wall area (µm<sup>2</sup>) ratios for the four groups depicted in A-D. (L) Mean aortic wall fibrotic area percentages for the four groups depicted in E-H.
