# Supplementary material
Source: PubMed Central journal article supplement (PMC4662083)
Supplement: NIHMS727408-supplement-Figure_7.pdf [file NIHMS727408-supplement-Figure_7.pdf]

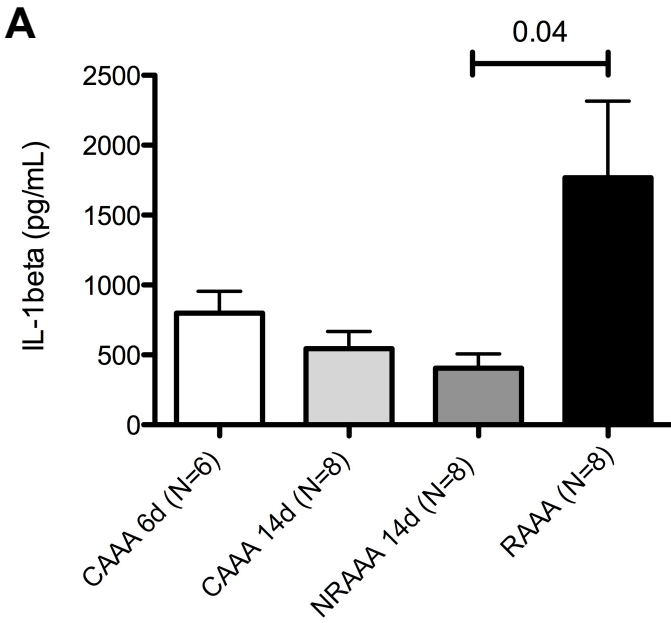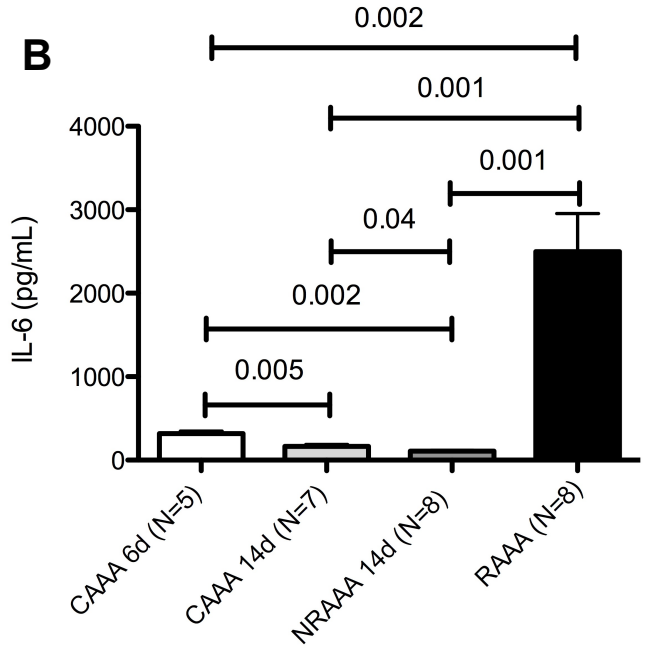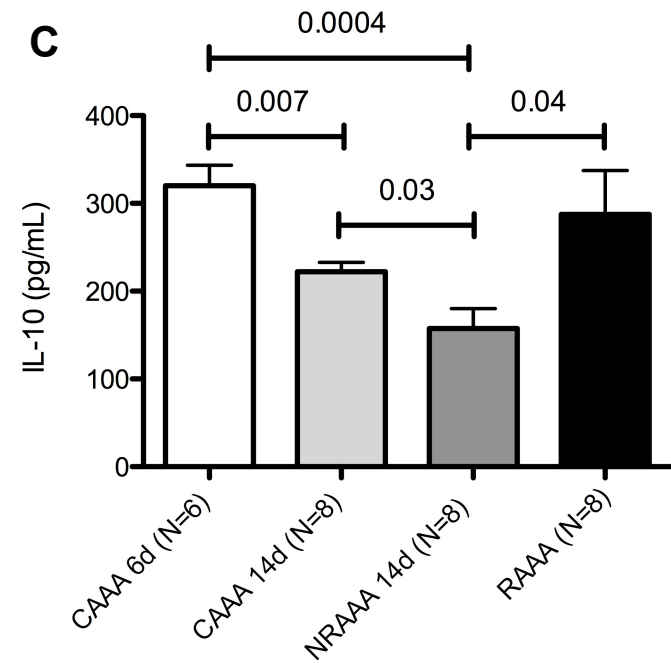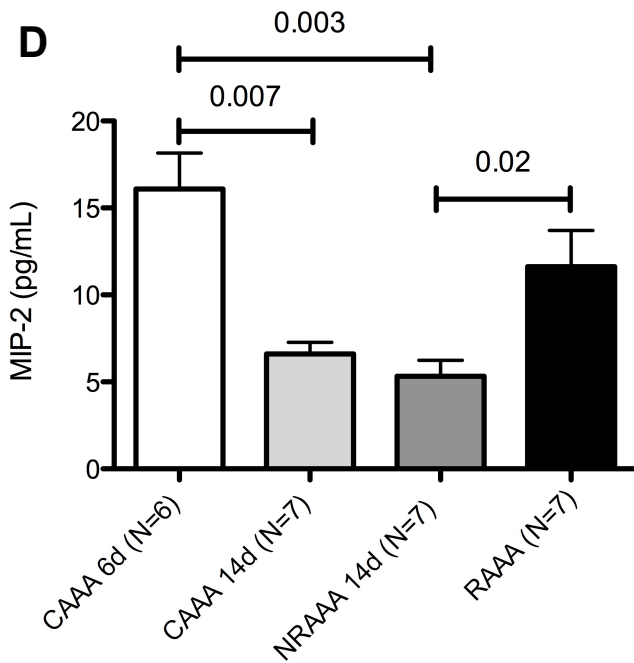

**Supplemental Figure 7. Increased IL-1 $\beta$ , IL-6, IL-10, MIP-2 production in ruptured abdominal aortic aneurysm (AAA) wall tissue compared with negative and positive control AAA tissue.** An increased pro-inflammatory state associated with this rupture model was demonstrated with a Bio-Plex bead array. **(A)** IL-1 $\beta$ , **(B)** IL-6, **(C)** IL-10, and **(D)** MIP-2 concentrations (pg/mL) for CAAA 6d, CAAA 14d, NRAAA 14d, and RAAA tissue.
