# Supplementary material
Source: PubMed Central journal article supplement (PMC4662083)
Supplement: NIHMS727408-supplement-Figure_8.pdf [file NIHMS727408-supplement-Figure_8.pdf]

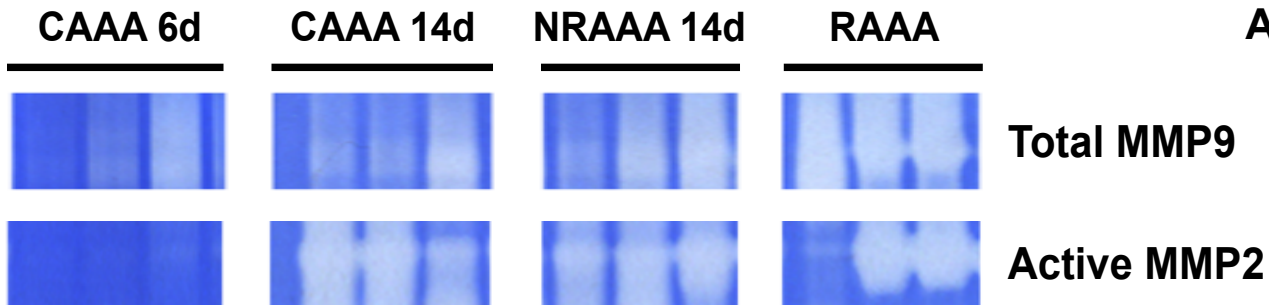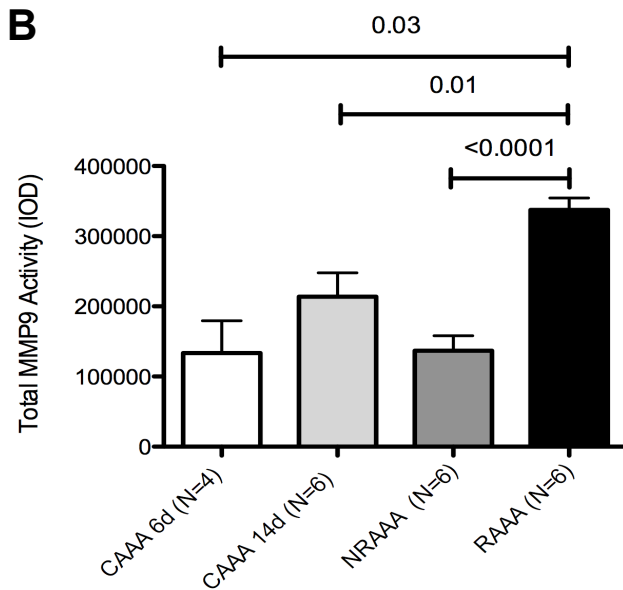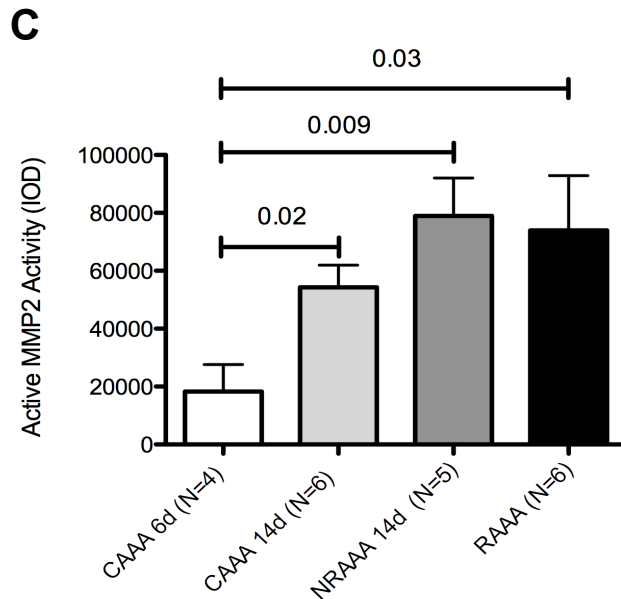

**Supplemental Figure 8. Increased matrix metalloproteinase (MMP) 9 zymographic activity in ruptured abdominal aortic aneurysm (AAA) tissue compared to negative (CAAA) and positive control (NRAAA 14d) tissue. (A)** Zymograms demonstrating total MMP9 and active MMP2 activity for CAAA 6d, CAAA 14d, NRAAA 14d, and RAAA tissues. **(B)** Total MMP9 activity in terms of IOD was comparable amongst the negative and positive control groups; however, MMP9 was significantly greater for RAAA tissue compared to each of the control groups. Three representative bands per group were cut from three different gels. **(C)** Significant increases in active MMP2 measured by integrated optical density (IOD) were noted between the CAAA 6d and CAAA 14d groups, as well as the CAAA 6d and NRAAA 14d groups; however, there was no statistically significant difference in active MMP2 zymographic active between the RAAA and NRAAA 14d groups.
