# Supplementary material
Source: PubMed Central journal article supplement (PMC4662083)
Supplement: NIHMS727408-supplement-Figure_9.pdf [file NIHMS727408-supplement-Figure_9.pdf]

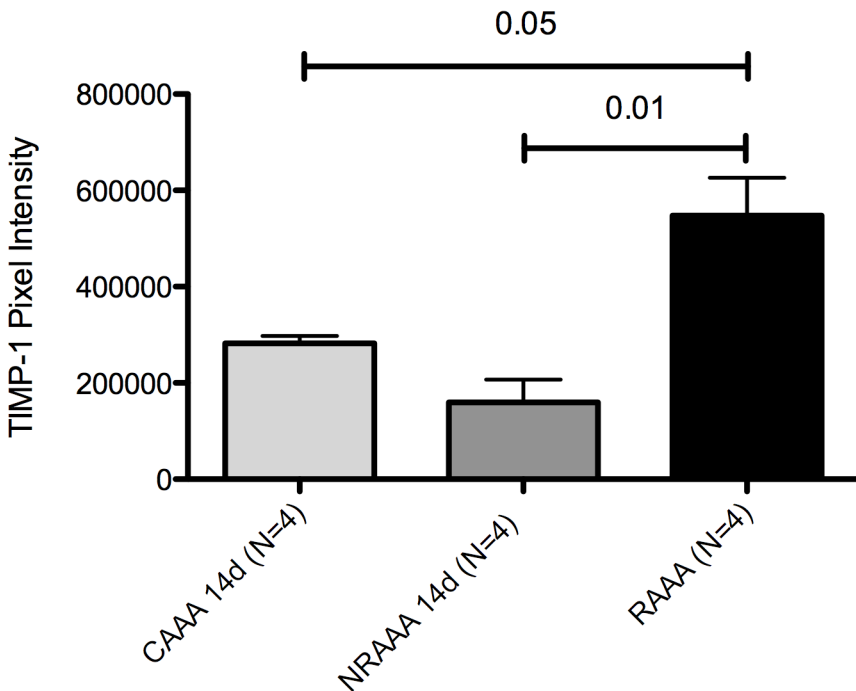

**Supplemental Figure 9. Increased TIMP-1 production by ruptured abdominal aortic aneurysm (AAA) wall tissue compared with negative (CAAA 14d) and positive control (NRAAA 14d) AAA tissue. Significantly greater TIMP-1 protein levels were observed in RAAA tissue compared to CAAA 14d and NRAAA 14d tissues by protein array analysis.**
